# Supplementary material for: Diversity, Phylogeny and Plant Growth Promotion Traits of Nodule Associated Bacteria Isolated from Lotus parviflorus
Source: MDPI journal article supplement (doi:10.3390/microorganisms8040499), 2020-03-31
Supplement: s1 [file s1]

## Supplementary materials

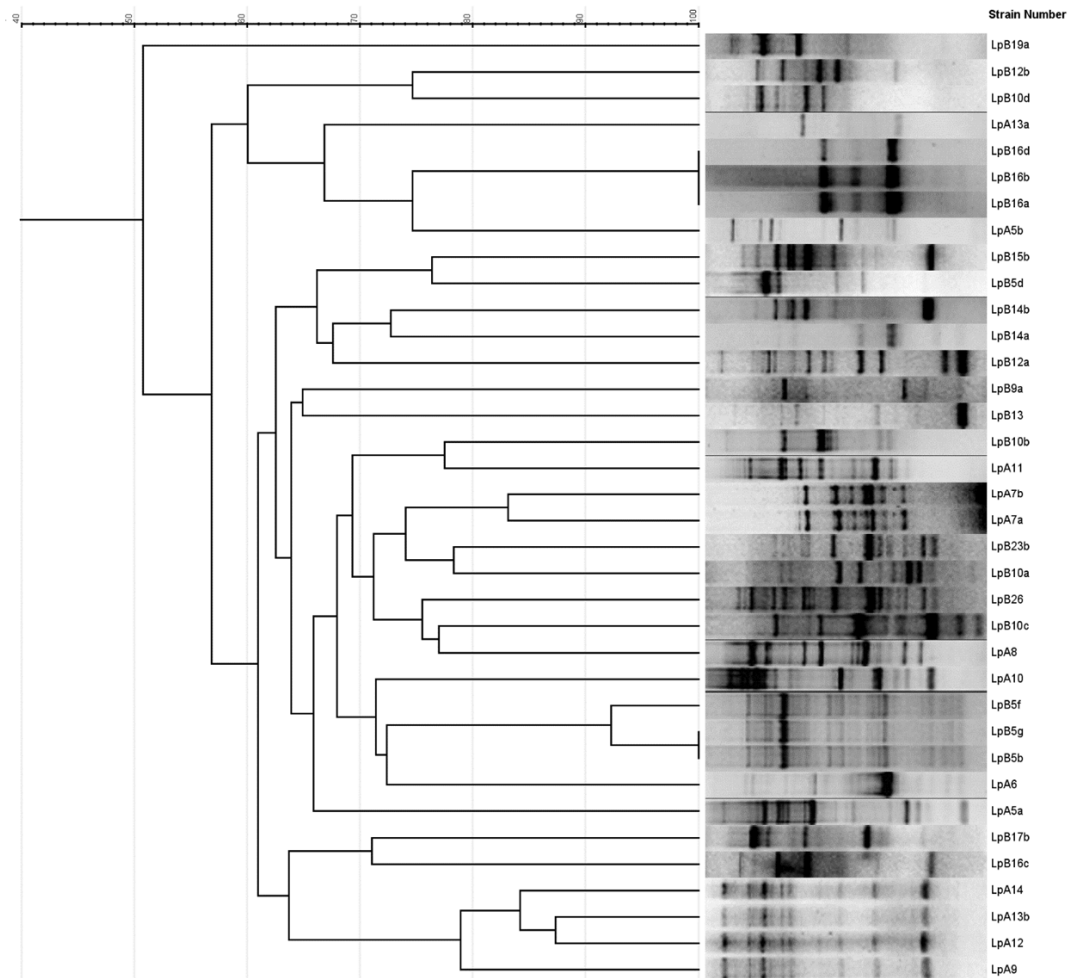

**Figure S1.** UPGMA dendrogram of REP-PCR genomic fingerprints from the bacterial isolates.

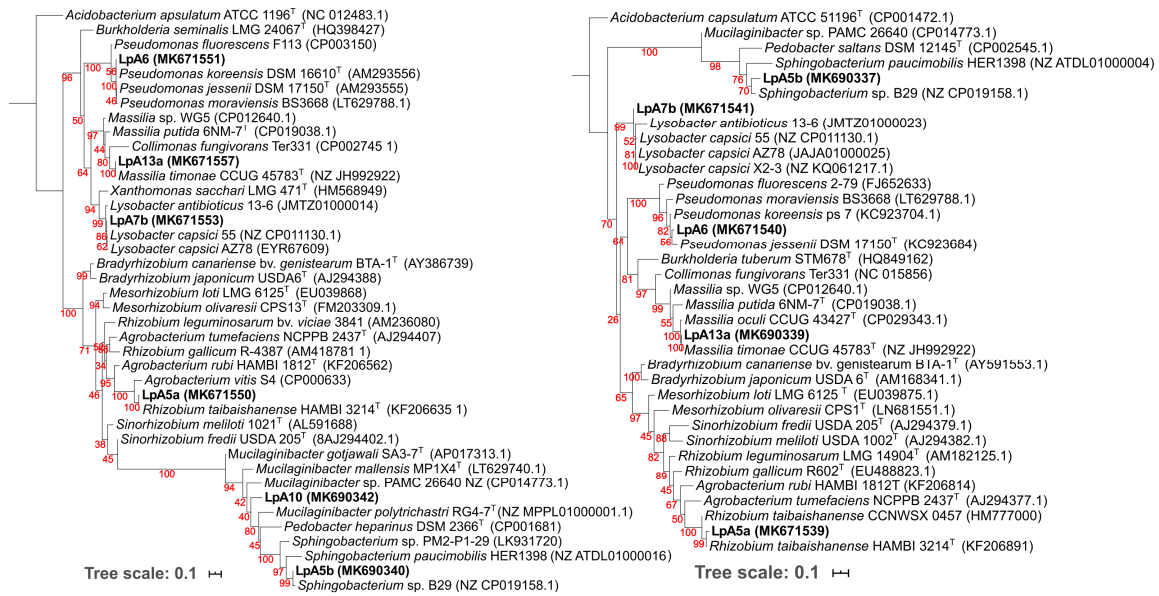

**Figure S2.** Phylogeny of *atpD* (left) and *recA* (right) genes based on 468 and 329 positions, respectively. Analyses were conducted with IQ-tree using Maximum Likelihood (ML) and ModelFinder (Best model: TIME+I+G4 (*atpD*) and TIM+F+I+G4 (*recA*)) and methods. Confidence levels of bootstrap are presented in red near each node. NCBI Genebank accession codes are present next to each strain. *Acidobacterium capsulatum* 1372<sup>T</sup> (NC\_012483.1 and CP001472.1), a bacterium from the Acidobacteria phylum, was selected as an outgroup. Isolates obtained from *L. parviflorus* are in bold.

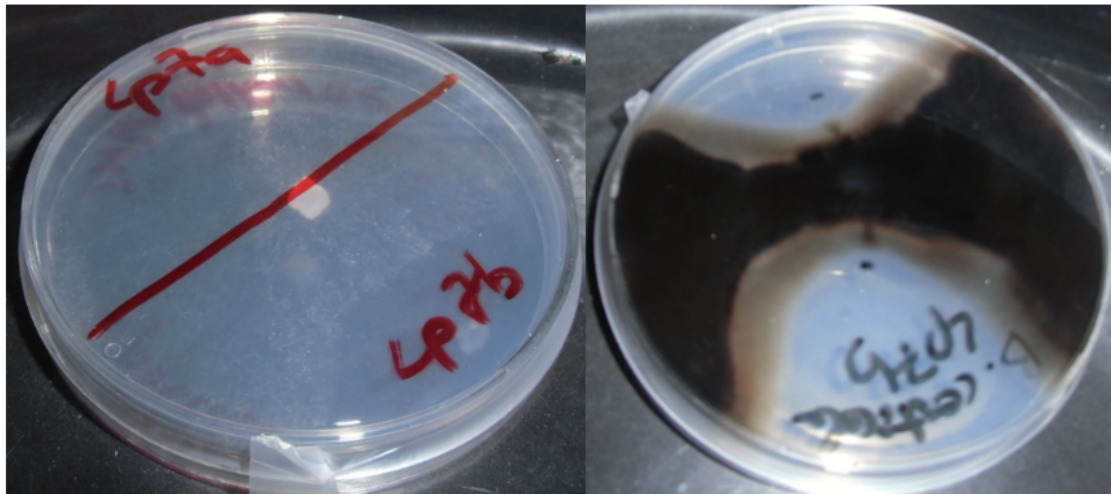

**Figure S3.** Inhibition of *P. cinnamomi* (left) and *B. corticola* (right) growth by the antagonistic activity of isolate LpA7b. In this figure Lp7a and Lp7b represent LpA7a and LpA7b.

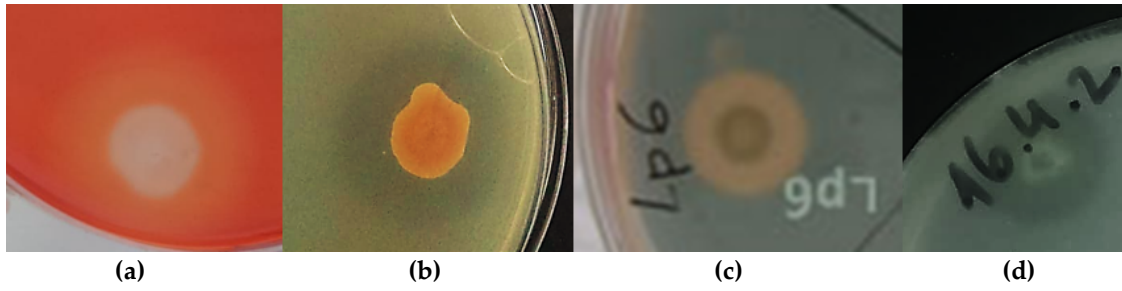

**Figure S4.** *In vitro* PGPR activities showed. **(a)** and **(b)** Hydrolytic enzyme production, cellulases **(a;** isolate LpB9b) and pectinases **(b;** isolate LpB9b); **(c)** Siderophore production (isolate LpA6); **(d)** P solubilization (isolate LpB16d). In this figure Lp6 and 16.4.2 represent LpA6 and LpB16d.
